# Supplementary material
Source: PubMed Central journal article supplement (PMC2908389)

Supplemental Figure 1: Foxp3 expression of naïve cells prior to transfer in vivo. Naïve CD4<sup>+</sup> T cells from DO11.10 Yeti mice (CD4<sup>+</sup>CD25<sup>-</sup>KJ126<sup>+</sup>YFP<sup>-</sup>) were sorted and stained to show Foxp3 expression prior to transfer into sOVARag<sup>-/-</sup> recipient mice.

Supplemental Figure 2: Foxp3 and IFN $\gamma$  expression in DO11.10 cells at day 10 post transfer. Lymph nodes of sOVARag<sup>-/-</sup> mice were harvested at day 10 post transfer of naïve DO11.10 T cells. Cells were re-stimulated overnight and stained for Foxp3 and IFN $\gamma$  expression.

Supplemental Figure 3: Foxp3 expression of WT and IFN $\gamma$ <sup>-/-</sup> cells prior to transfer in vivo. Naïve CD4<sup>+</sup> T cells from WT or IFN $\gamma$ <sup>-/-</sup> DO11.10 mice (CD4<sup>+</sup>CD25<sup>-</sup>KJ126<sup>+</sup>) and in vitro activated WT or IFN $\gamma$ <sup>-/-</sup> CD4<sup>+</sup> T cells (CD4<sup>+</sup>CD25<sup>+</sup>KJ126<sup>+</sup>) were sorted and stained to show Foxp3 expression prior to transfer into sOVARag<sup>-/-</sup> recipient mice.

Supplemental Fig 1.

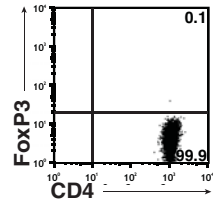

## Supplimental Fig 2

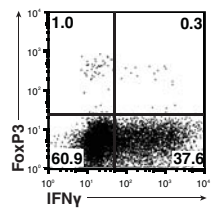

### Supplemental Fig 3

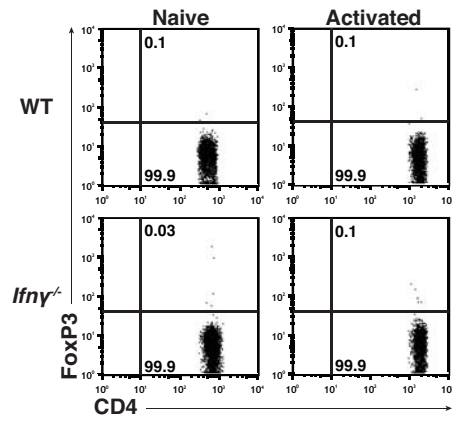

Supplement: NIHMS218818-supplement-Supplementary_text_and_figures.pdf [file NIHMS218818-supplement-Supplementary_text_and_figures.pdf]
